# Supplementary material for: Rational design of cyclopenta[b]naphthalenes for better optoelectronic applications and their photophysical properties using DFT/TD-DFT methods
Source: Royal Society of Chemistry journal article supplement (doi:10.1039/c6ra04844g), 2016-01-01
Supplement: c6ra04844g1.pdf [file c6ra04844g1.pdf]

## *Supporting Information*

### **Rational Design of Cyclopenta[b]naphthalenes for Better Optoelectronic Applications and their Photophysical Properties Using DFT/TD-DFT Methods**

Rajangam Jagadeesan, ♣<sup>a</sup> Gunasekaran Velmurugan♣<sup>a,b</sup> and  
Ponnambalam Venuvanalingam<sup>a\*</sup>

<sup>a</sup>Theoretical and Computational Chemistry Laboratory, School of Chemistry, Bharathidasan University, Tiruchirappalli - 620 024.

<sup>b</sup>Department of Chemistry, Indian Institute of Technology Bombay, Powai, Mumbai, Maharashtra - 400 076

\*<sup>a</sup> Author for correspondence

E-Mail: [venuvanalingam@yahoo.com](mailto:venuvanalingam@yahoo.com), Ph: ++91-431-2407053, Fax: ++91-431-2407045

♣ Denotes equal contribution as first authors.

## Supporting Information

### List of Figures

| Figure No. | Title                                                                                                                                                     | Page No. |
|------------|-----------------------------------------------------------------------------------------------------------------------------------------------------------|----------|
| SIF1.      | Optimized geometries of cyclopenta[b]naphthalene derivatives at B3LYP/6-311+G(d,p) level.                                                                 | 3        |
| SIF2a.     | SIF2a. Highest occupied molecular orbital and lowest unoccupied molecular orbitals of CPN1 and its derivatives computed at the B3LYP/6-311+G(d,p) level.. | 5        |
| SIF2b.     | SIF2b. Highest occupied molecular orbital and lowest unoccupied molecular orbitals of CPN2 and its derivatives computed at the B3LYP/6-311+G(d,p) level.  | 6        |
| SIF2c.     | SIF2c. Highest occupied molecular orbital and lowest unoccupied molecular orbitals of CPN3 and its derivatives computed at the B3LYP/6-311+G(d,p) level.  | 7        |

### List of Tables

| Table No. | Title                                                                                                                                                                   | Page No. |
|-----------|-------------------------------------------------------------------------------------------------------------------------------------------------------------------------|----------|
| SIT1      | SIT1. Computed absorption maxima ( $\lambda_{max}$ , nm) of experimental reported CPNs in DCM solution using TD-DFT method at the PBE1PBE with various basis set level. | 8        |
| SIT2.     | SIT2. Molecular orbital composition (%) of various fragments in the ground state geometry of CPNs computed at the B3LYP/6-311+G(d,p) level.                             | 9        |
| SIT3.     | SIT3. Computed bond parameters of optimized geometries of Cyclopenta[b]naphthalene derivatives computed at the B3LYP/6-311+G(d,p) level.                                | 10       |
| SIT4.     | SIT4. Computed bond parameters of optimized geometries of Cyclopenta[b]naphthalene derivatives computed at the B3LYP/6-311+G(d,p) level.                                | 11       |
| SIT5.     | SIT5. Frontier molecular orbital energies (eV) of CPN derivatives in ground state ( $S_0$ ) computed at the B3LYP/6-311+G(d,p) level.                                   | 12       |
| SIT6.     | SIT6. Frontier molecular orbital energies (eV) of excited state ( $S_1$ ) CPN derivatives computed at the PBE1PBE/6-311++G(d,p)level.                                   | 13       |

### Coordinates of the chosen molecules

SIF1. Optimized geometries of cyclopean[b]naphthalene derivatives at B3LYP/6-311+G(d,p) level.

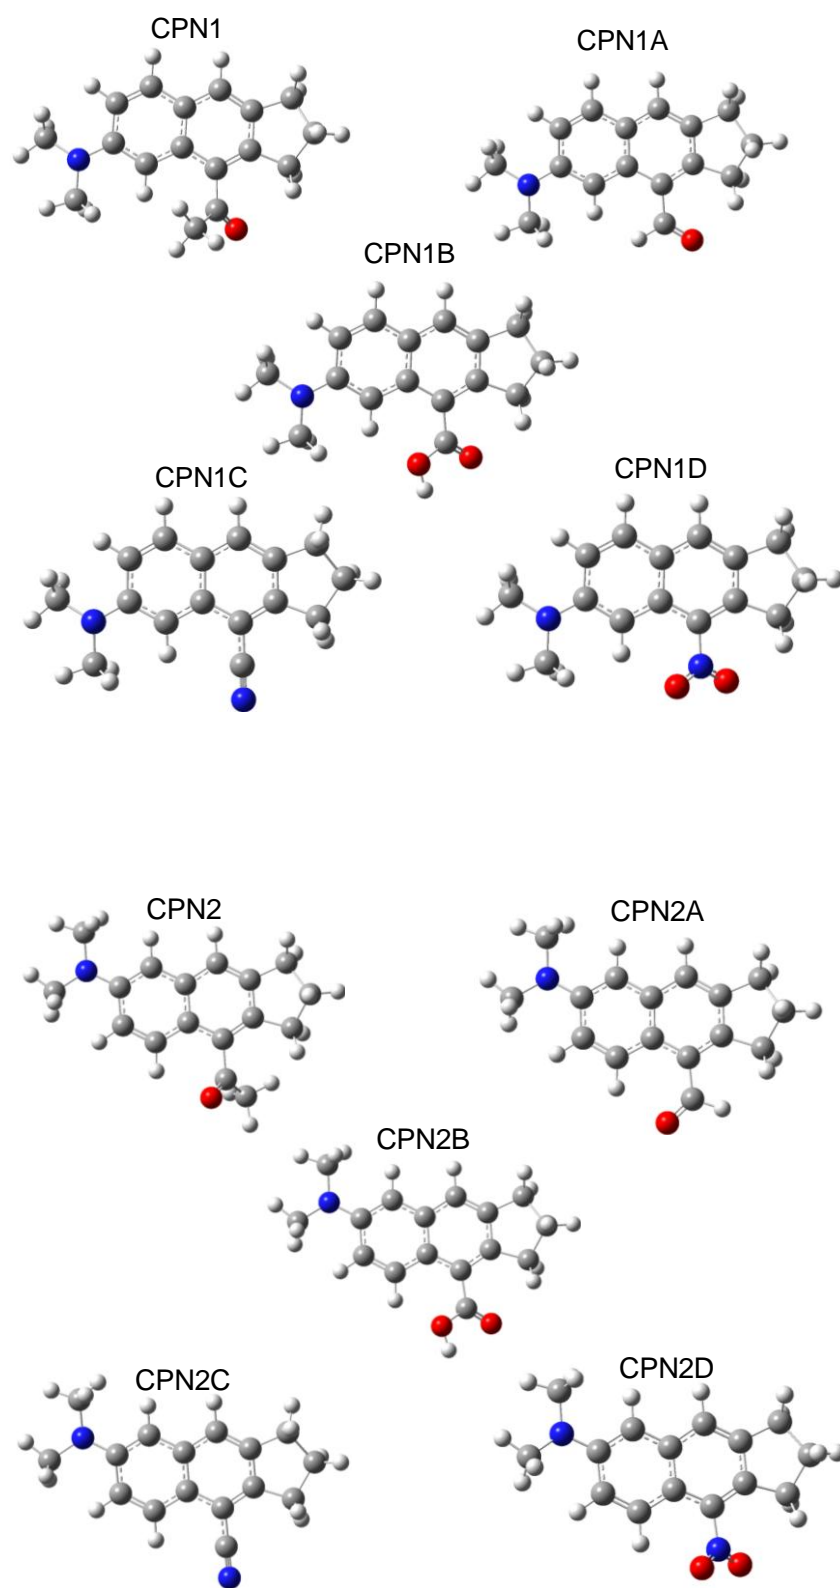

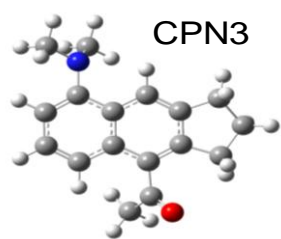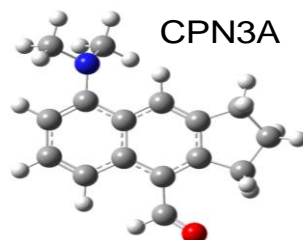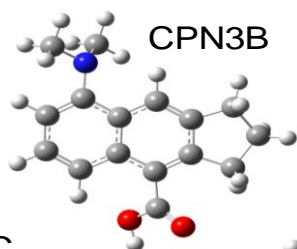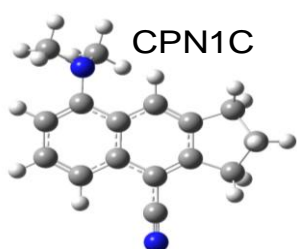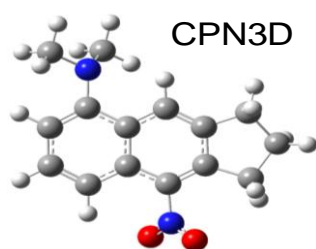

SIF2a. Highest occupied molecular orbital and lowest unoccupied molecular orbitals of CPN1 and its derivatives computed at the B3LYP/6-311+G(d,p) level..

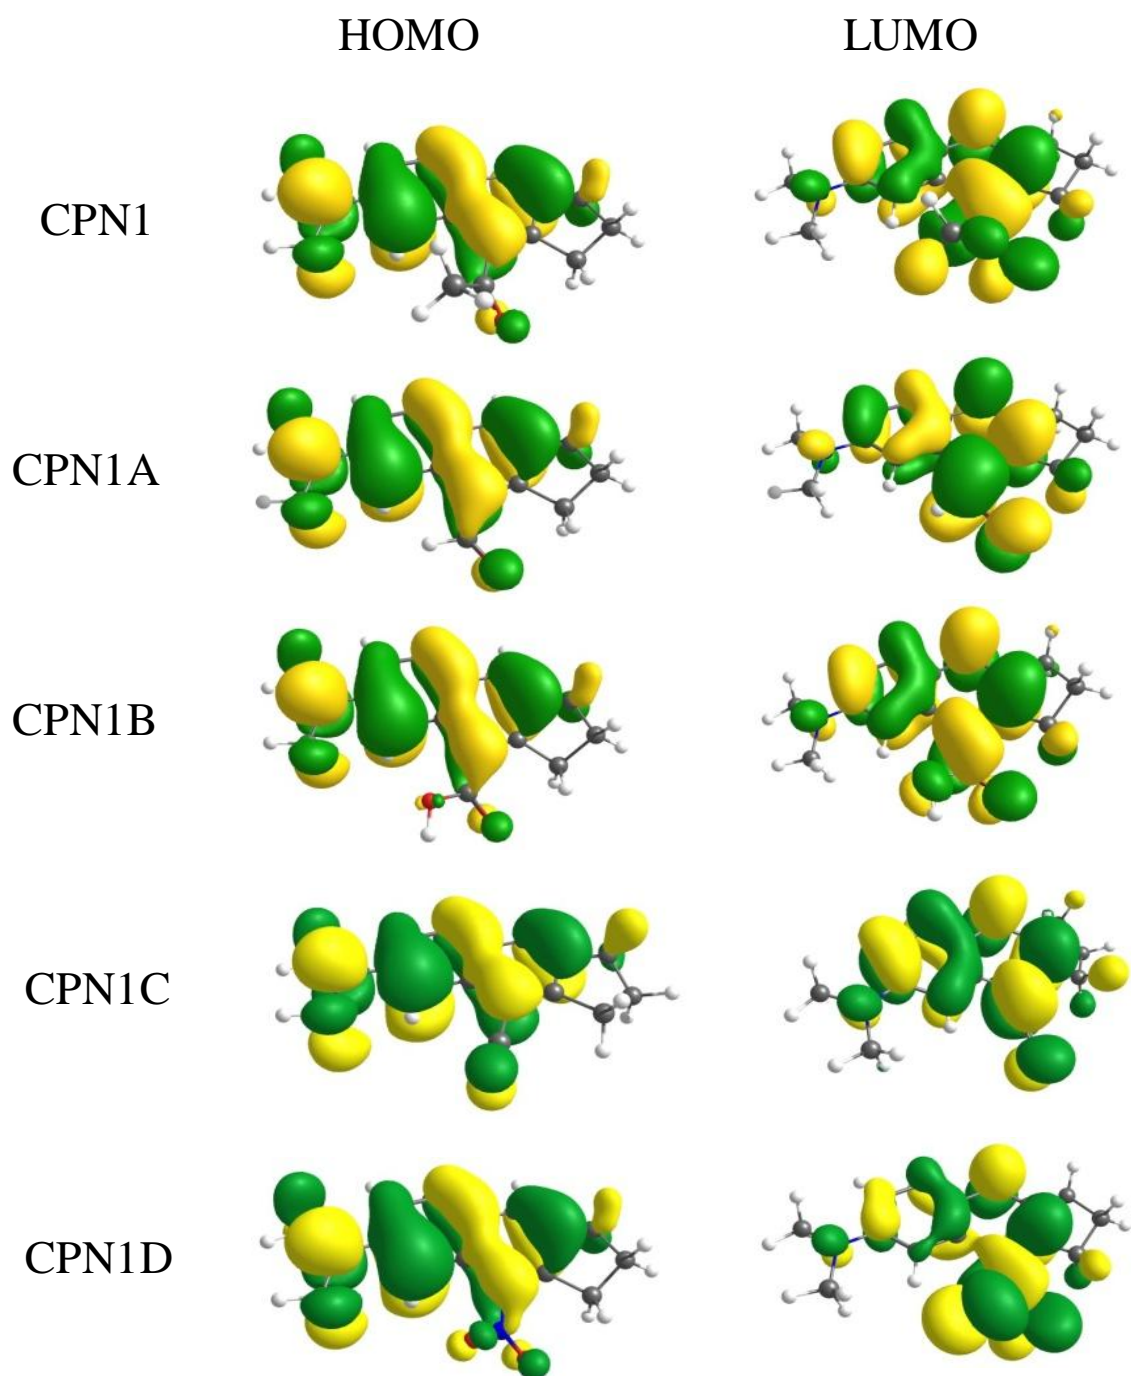

SIF2b. Highest occupied molecular orbital and lowest unoccupied molecular orbitals of CPN2 and its derivatives computed at the B3LYP/6-311+G(d,p) level.

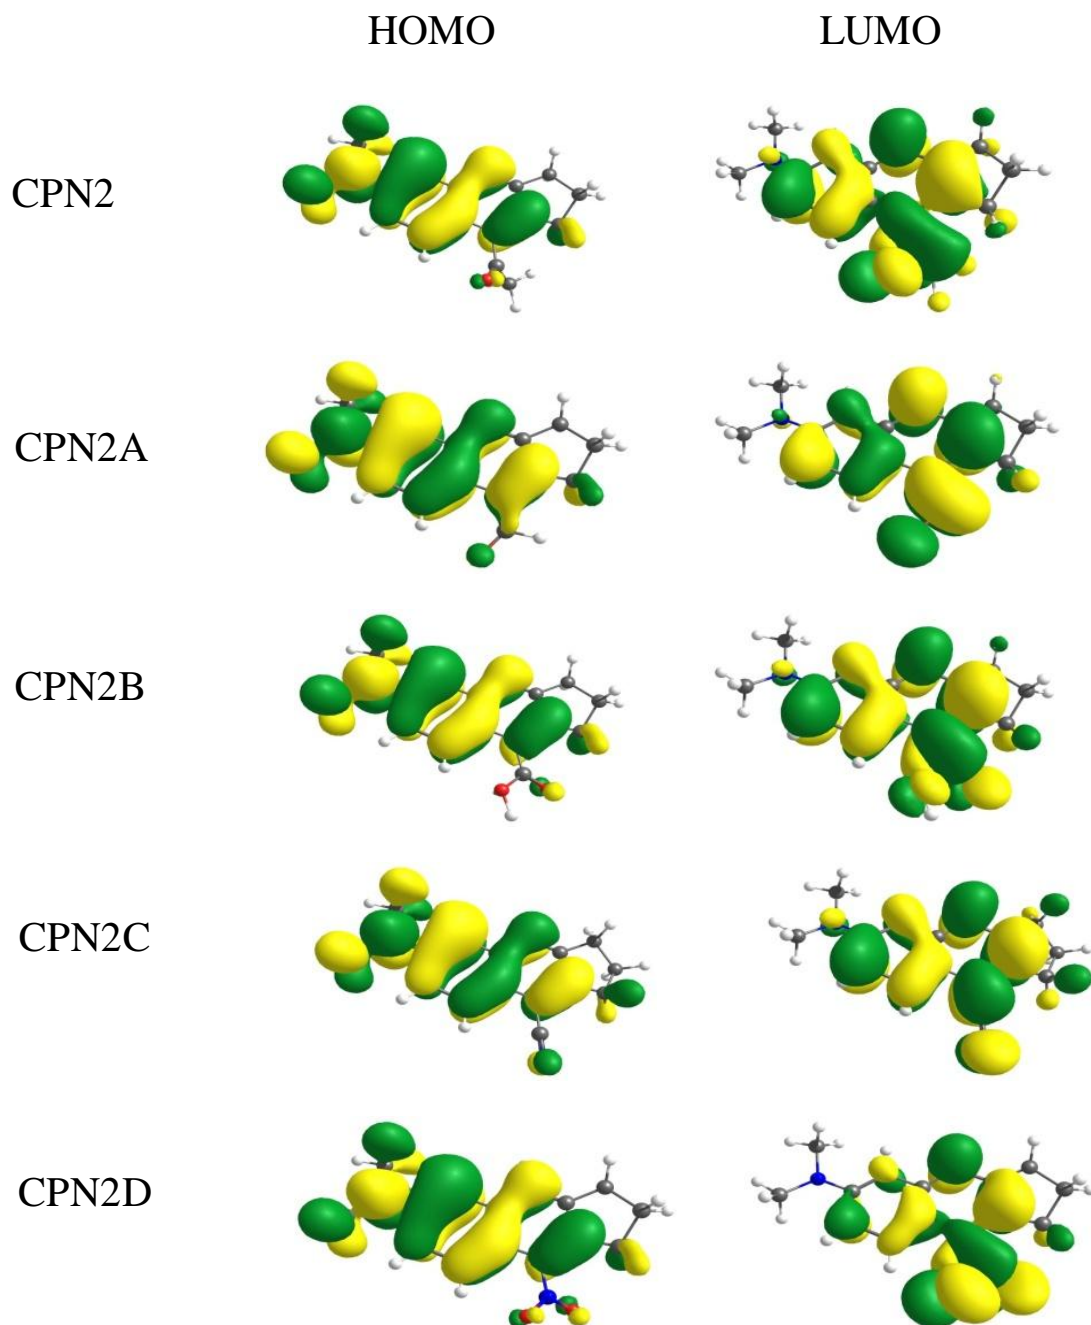

SIF2c. Highest occupied molecular orbital and lowest unoccupied molecular orbitals of CPN3 and its derivatives computed at the B3LYP/6-311+G(d,p) level.

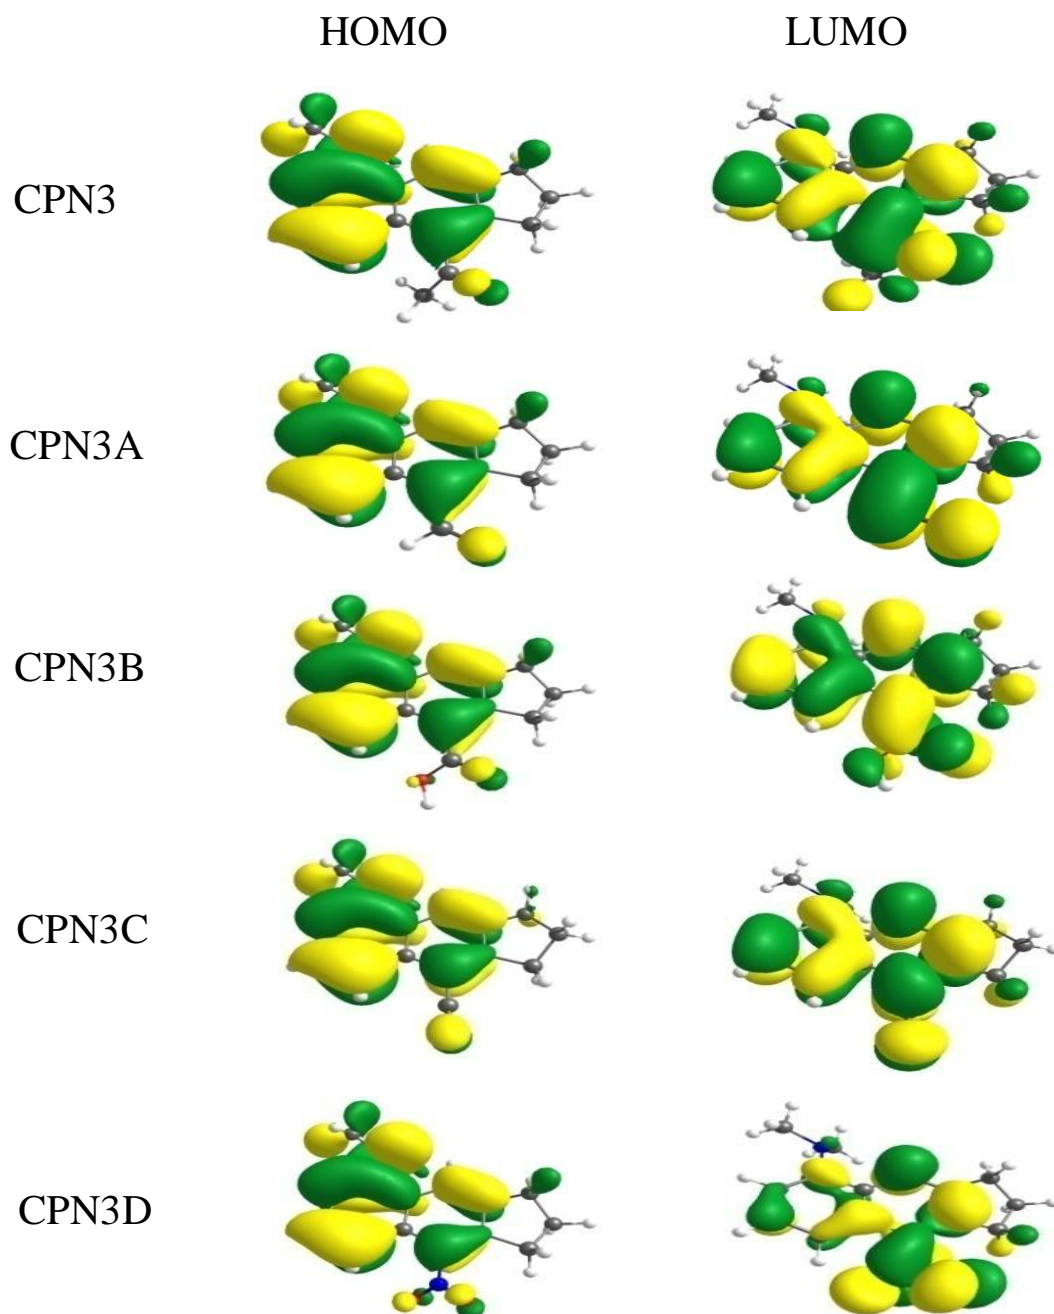

SIT1. Computed absorption maxima ( $\lambda_{\text{max}}$ , nm) of experimental reported CPNs in DCM solution using TD-DFT method at the PBE1PBE with various basis set level.

| <b>Molecule</b> | <b>EXP*</b> | <b>6-31+g(d)</b> | <b>6-31+g(d,p)</b> | <b>6-311g(d)</b> | <b>6-311g(d,p)</b> | <b>6-311+g(d,p)</b> |
|-----------------|-------------|------------------|--------------------|------------------|--------------------|---------------------|
| CPN1            | 377         | 388              | 389                | 383              | 384                | 390                 |
| CPN1A           | 437         | 422              | 424                | 414              | 416                | 425                 |
| CPN2            | 372         | 374              | 375                | 370              | 371                | 378                 |
| CPN3            | 334         | 368              | 369                | 364              | 365                | 372                 |

\*E. Benedetti, L. S. Kocsis and K. M. Brummond, *J. Am. Chem. Soc.*, 2012, **134**, 12418- 12421.



SIT2. Molecular orbital composition (%) of various fragments in the ground state geometry of CPNs computed at the B3LYP/6-311+G(d,p) level.

| Fragments | CPN1 |      | CPN1A |      | CPN1B |      | CPN1C |      | CPN1D |      |
|-----------|------|------|-------|------|-------|------|-------|------|-------|------|
|           | HOMO | LUMO | HOMO  | LUMO | HOMO  | LUMO | HOMO  | LUMO | HOMO  | LUMO |
| CPN       | 86   | 88   | 70    | 90   | 79    | 97   | 73    | 94   | 87    | 96   |
| A         | 1    | 11   | 2     | 9    | 1     | 2    | 1     | 4    | 1     | 4    |
| D         | 13   | 1    | 28    | 1    | 20    | 1    | 25    | 1    | 12    | 0    |
| Fragment  | CPN2 |      | CPN2A |      | CPN2B |      | CPN2C |      | CPN2D |      |
|           | HOMO | LUMO | HOMO  | LUMO | HOMO  | LUMO | HOMO  | LUMO | HOMO  | LUMO |
| CPN       | 81   | 97   | 71    | 97   | 79    | 99   | 71    | 94   | 84    | 95   |
| A         | 2    | 2    | 1     | 3    | 1     | 1    | 2     | 5    | 1     | 4    |
| D         | 17   | 0    | 27    | 0    | 20    | 0%   | 27    | 1    | 14    | 0    |
| Fragment  | CPN3 |      | CPN3A |      | CPN3B |      | CPN3C |      | CPN3D |      |
|           | HOMO | LUMO | HOMO  | LUMO | HOMO  | LUMO | HOMO  | LUMO | HOMO  | LUMO |
| CPN       | 89   | 95   | 89    | 97   | 90    | 99   | 82    | 89   | 90    | 89   |
| A         | 2    | 5    | 1     | 3    | 1     | 1    | 2     | 10   | 1     | 10   |
| D         | 8    | 0    | 10    | 0    | 9     | 0    | 16    | 1    | 9     | 1    |

SIT3. Computed bond parameters of optimized geometries of Cyclopenta[b]naphthalene derivatives computed at the B3LYP/6-311+G(d,p) level.

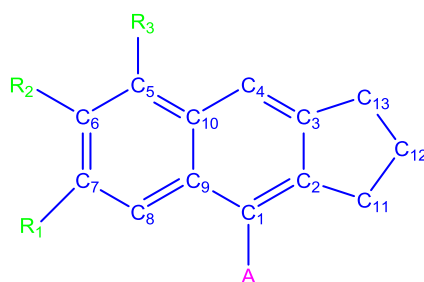

| Molecule |    | C-Donor | C-Acceptor | C1-C2-C11-C12 | C4-C3-C13-C12 |
|----------|----|---------|------------|---------------|---------------|
| CPN1     | GS | 1.391   | 1.499      | -160.7        | 162.0         |
|          | ES | 1.378   | 1.474      | -162.0        | 163.6         |
| CPN1A    | GS | 1.387   | 1.472      | -163.5        | 162.4         |
|          | ES | 1.382   | 1.454      | -166.3        | 163.6         |
| CPN1B    | GS | 1.390   | 1.486      | -161.8        | 162.7         |
|          | ES | 1.383   | 1.455      | -164.9        | 162.8         |
| CPN1C    | GS | 1.384   | 1.427      | 163.3         | -163.0        |
|          | ES | 1.383   | 1.411      | 166.3         | -165.2        |
| CPN1D    | GS | 1.383   | 1.468      | -161.1        | 162.8         |
|          | ES | 1.366   | 1.434      | -164.9        | 164.1         |
| CPN2     | GS | 1.392   | 1.508      | -158.7        | 160.4         |
|          | ES | 1.380   | 1.463      | -160.5        | 161.5         |
| CPN2A    | GS | 1.390   | 1.476      | -163.5        | 162.4         |
|          | ES | 1.383   | 1.446      | -166.3        | 164.6         |
| CPN2B    | GS | 1.392   | 1.488      | -161.4        | 162.4         |
|          | ES | 1.384   | 1.447      | -166.8        | 164.3         |
| CPN2C    | GS | 1.388   | 1.429      | 163.0         | -162.7        |
|          | ES | 1.386   | 1.407      | 166.6         | -166.4        |
| CPN2D    | GS | 1.392   | 1.508      | -158.7        | 160.4         |
|          | ES | 1.366   | 1.435      | -165.1        | 164.1         |
| CPN3     | GS | 1.421   | 1.502      | 162.6         | -161.7        |
|          | ES | 1.390   | 1.465      | 165.1         | -162.7        |
| CPN3A    | GS | 1.421   | 1.477      | 165.7         | -161.8        |
|          | ES | 1.389   | 1.448      | 168.1         | -163.4        |
| CPN3B    | GS | 1.423   | 1.489      | 163.2         | -162.0        |
|          | ES | 1.392   | 1.450      | 167.5         | -163.3        |
| CPN3C    | GS | 1.429   | 1.422      | -160.9        | 163.0         |
|          | ES | 1.394   | 1.406      | -165.0        | 166.8         |
| CPN3D    | GS | 1.422   | 1.474      | 162.9         | -162.4        |
|          | ES | 1.373   | 1.435      | 167.2         | -164.1        |

SIT4. Computed bond parameters of optimized geometries of Cyclopenta[b]naphthalene derivatives computed at the B3LYP/6-311+G(d,p) level.

| Molecule |    | C <sub>1</sub> -C <sub>2</sub> | C <sub>2</sub> -C <sub>3</sub> | C <sub>3</sub> -C <sub>4</sub> | C <sub>5</sub> -C <sub>6</sub> | C <sub>6</sub> -C <sub>7</sub> | C <sub>7</sub> -C <sub>8</sub> | C <sub>8</sub> -C <sub>9</sub> | C <sub>9</sub> -C <sub>10</sub> | C <sub>1</sub> -C <sub>9</sub> | C <sub>10</sub> -C <sub>4</sub> | C <sub>10</sub> -C <sub>5</sub> | C <sub>2</sub> -C <sub>11</sub> | C <sub>11</sub> -C <sub>12</sub> | C <sub>12</sub> -C <sub>13</sub> | C <sub>3</sub> -C <sub>13</sub> |
|----------|----|--------------------------------|--------------------------------|--------------------------------|--------------------------------|--------------------------------|--------------------------------|--------------------------------|---------------------------------|--------------------------------|---------------------------------|---------------------------------|---------------------------------|----------------------------------|----------------------------------|---------------------------------|
| CPN1     | GS | 1.385                          | 1.419                          | 1.370                          | 1.369                          | 1.428                          | 1.395                          | 1.411                          | 1.432                           | 1.440                          | 1.417                           | 1.417                           | 1.515                           | 1.546                            | 1.546                            | 1.513                           |
|          | ES | 1.413                          | 1.412                          | 1.386                          | 1.377                          | 1.418                          | 1.418                          | 1.417                          | 1.431                           | 1.450                          | 1.427                           | 1.424                           | 1.511                           | 1.547                            | 1.545                            | 1.507                           |
| CPN1A    | GS | 1.393                          | 1.415                          | 1.372                          | 1.368                          | 1.428                          | 1.396                          | 1.416                          | 1.433                           | 1.448                          | 1.415                           | 1.417                           | 1.513                           | 1.546                            | 1.545                            | 1.513                           |
|          | ES | 1.416                          | 1.413                          | 1.382                          | 1.379                          | 1.419                          | 1.418                          | 1.418                          | 1.426                           | 1.453                          | 1.436                           | 1.424                           | 1.512                           | 1.548                            | 1.546                            | 1.510                           |
| CPN1B    | GS | 1.391                          | 1.417                          | 1.370                          | 1.368                          | 1.427                          | 1.395                          | 1.415                          | 1.435                           | 1.448                          | 1.415                           | 1.417                           | 1.516                           | 1.545                            | 1.543                            | 1.513                           |
|          | ES | 1.429                          | 1.411                          | 1.384                          | 1.382                          | 1.414                          | 1.419                          | 1.420                          | 1.430                           | 1.453                          | 1.439                           | 1.421                           | 1.513                           | 1.548                            | 1.544                            | 1.510                           |
| CPN1C    | GS | 1.384                          | 1.415                          | 1.374                          | 1.370                          | 1.431                          | 1.396                          | 1.409                          | 1.431                           | 1.439                          | 1.417                           | 1.418                           | 1.511                           | 1.548                            | 1.548                            | 1.514                           |
|          | ES | 1.425                          | 1.402                          | 1.395                          | 1.388                          | 1.416                          | 1.419                          | 1.413                          | 1.428                           | 1.441                          | 1.438                           | 1.419                           | 1.505                           | 1.551                            | 1.549                            | 1.511                           |
| CPN1D    | GS | 1.381                          | 1.416                          | 1.372                          | 1.368                          | 1.429                          | 1.397                          | 1.400                          | 1.436                           | 1.438                          | 1.414                           | 1.417                           | 1.514                           | 1.546                            | 1.545                            | 1.513                           |
|          | ES | 1.413                          | 1.410                          | 1.394                          | 1.372                          | 1.433                          | 1.419                          | 1.412                          | 1.437                           | 1.439                          | 1.404                           | 1.431                           | 1.507                           | 1.549                            | 1.552                            | 1.511                           |
| CPN2     | GS | 1.381                          | 1.422                          | 1.369                          | 1.391                          | 1.428                          | 1.371                          | 1.420                          | 1.432                           | 1.432                          | 1.423                           | 1.415                           | 1.520                           | 1.546                            | 1.545                            | 1.513                           |
|          | ES | 1.428                          | 1.407                          | 1.386                          | 1.415                          | 1.420                          | 1.376                          | 1.435                          | 1.429                           | 1.465                          | 1.421                           | 1.417                           | 1.521                           | 1.545                            | 1.542                            | 1.512                           |
| CPN2A    | GS | 1.392                          | 1.418                          | 1.370                          | 1.392                          | 1.427                          | 1.374                          | 1.419                          | 1.431                           | 1.442                          | 1.423                           | 1.415                           | 1.522                           | 1.547                            | 1.544                            | 1.512                           |
|          | ES | 1.419                          | 1.403                          | 1.390                          | 1.413                          | 1.422                          | 1.376                          | 1.432                          | 1.428                           | 1.457                          | 1.422                           | 1.418                           | 1.513                           | 1.548                            | 1.547                            | 1.513                           |
| CPN2B    | GS | 1.387                          | 1.420                          | 1.368                          | 1.390                          | 1.426                          | 1.372                          | 1.420                          | 1.433                           | 1.441                          | 1.422                           | 1.415                           | 1.516                           | 1.546                            | 1.545                            | 1.513                           |
|          | ES | 1.434                          | 1.397                          | 1.395                          | 1.411                          | 1.417                          | 1.382                          | 1.430                          | 1.435                           | 1.465                          | 1.417                           | 1.419                           | 1.515                           | 1.547                            | 1.544                            | 1.512                           |
| CPN2C    | GS | 1.382                          | 1.417                          | 1.371                          | 1.394                          | 1.430                          | 1.372                          | 1.415                          | 1.429                           | 1.434                          | 1.425                           | 1.415                           | 1.510                           | 1.548                            | 1.548                            | 1.514                           |
|          | ES | 1.425                          | 1.390                          | 1.408                          | 1.415                          | 1.419                          | 1.387                          | 1.417                          | 1.432                           | 1.453                          | 1.416                           | 1.420                           | 1.506                           | 1.549                            | 1.550                            | 1.512                           |
| CPN2D    | GS | 1.381                          | 1.421                          | 1.369                          | 1.392                          | 1.428                          | 1.371                          | 1.418                          | 1.433                           | 1.430                          | 1.424                           | 1.414                           | 1.513                           | 1.546                            | 1.545                            | 1.513                           |
|          | ES | 1.399                          | 1.414                          | 1.377                          | 1.421                          | 1.432                          | 1.367                          | 1.432                          | 1.437                           | 1.441                          | 1.430                           | 1.401                           | 1.500                           | 1.548                            | 1.553                            | 1.514                           |
| CPN3     | GS | 1.382                          | 1.418                          | 1.370                          | 1.382                          | 1.409                          | 1.373                          | 1.421                          | 1.434                           | 1.436                          | 1.421                           | 1.439                           | 1.515                           | 1.546                            | 1.546                            | 1.514                           |
|          | ES | 1.426                          | 1.398                          | 1.395                          | 1.416                          | 1.390                          | 1.391                          | 1.433                          | 1.424                           | 1.454                          | 1.432                           | 1.445                           | 1.514                           | 1.549                            | 1.546                            | 1.512                           |
| CPN3A    | GS | 1.389                          | 1.415                          | 1.371                          | 1.382                          | 1.408                          | 1.373                          | 1.422                          | 1.435                           | 1.445                          | 1.420                           | 1.439                           | 1.513                           | 1.547                            | 1.545                            | 1.513                           |
|          | ES | 1.424                          | 1.399                          | 1.391                          | 1.414                          | 1.390                          | 1.389                          | 1.435                          | 1.420                           | 1.455                          | 1.437                           | 1.445                           | 1.514                           | 1.549                            | 1.546                            | 1.513                           |
| CPN3B    | GS | 1.385                          | 1.417                          | 1.369                          | 1.381                          | 1.409                          | 1.373                          | 1.421                          | 1.436                           | 1.443                          | 1.419                           | 1.439                           | 1.515                           | 1.545                            | 1.544                            | 1.513                           |
|          | ES | 1.432                          | 1.395                          | 1.394                          | 1.414                          | 1.388                          | 1.391                          | 1.436                          | 1.421                           | 1.460                          | 1.437                           | 1.444                           | 1.514                           | 1.548                            | 1.545                            | 1.512                           |
| CPN3C    | GS | 1.382                          | 1.415                          | 1.372                          | 1.383                          | 1.410                          | 1.373                          | 1.417                          | 1.431                           | 1.437                          | 1.422                           | 1.438                           | 1.510                           | 1.548                            | 1.548                            | 1.514                           |
|          | ES | 1.426                          | 1.388                          | 1.404                          | 1.417                          | 1.389                          | 1.392                          | 1.425                          | 1.418                           | 1.451                          | 1.439                           | 1.442                           | 1.506                           | 1.550                            | 1.549                            | 1.512                           |
| CPN3D    | GS | 1.375                          | 1.417                          | 1.371                          | 1.381                          | 1.409                          | 1.373                          | 1.419                          | 1.435                           | 1.432                          | 1.420                           | 1.439                           | 1.512                           | 1.547                            | 1.546                            | 1.514                           |
|          | ES | 1.386                          | 1.403                          | 1.390                          | 1.419                          | 1.387                          | 1.394                          | 1.417                          | 1.436                           | 1.439                          | 1.432                           | 1.453                           | 1.505                           | 1.549                            | 1.553                            | 1.513                           |

SIT5. Frontier molecular orbital energies (eV) of CPN derivatives in ground state ( $S_0$ ) computed at the B3LYP/6-311+G(d,p) level.

| Molecule | HOMO-2 | HOMO-1 | HOMO  | LUMO  | LUMO+1 | LUMO+2 | Band gap |
|----------|--------|--------|-------|-------|--------|--------|----------|
| CPN      | -7.81  | -6.47  | -5.93 | -1.26 | 0.41   | 0.14   | 4.66     |
| CPN1     | -6.79  | -6.21  | -5.34 | -1.61 | -0.66  | -0.26  | 3.73     |
| CPN1A    | -6.76  | -6.33  | -5.42 | -1.94 | -0.70  | -0.34  | 3.48     |
| CPN1B    | -7.19  | -6.25  | -5.28 | -1.63 | -0.42  | -0.19  | 3.65     |
| CPN1C    | -7.40  | -6.44  | -5.45 | -1.77 | -0.50  | -0.23  | 3.68     |
| CPN1D    | -7.42  | -6.55  | -5.49 | -2.39 | -1.21  | -0.51  | 3.10     |
| CPN2     | -6.84  | -6.11  | -5.25 | -1.47 | -0.61  | -0.21  | 3.78     |
| CPN2A    | -6.77  | -6.26  | -5.37 | -2.08 | -0.38  | -0.26  | 3.29     |
| CPN2B    | -7.21  | -6.21  | -5.32 | -1.65 | -0.34  | -0.22  | 3.67     |
| CPN2C    | -7.39  | -6.41  | -5.50 | -1.82 | -0.52  | -0.28  | 3.68     |
| CPN2D    | -7.49  | -6.50  | -5.55 | -2.43 | -1.22  | -0.54  | 3.12     |
| CPN3     | -6.67  | -6.56  | -5.66 | -1.77 | -0.68  | -0.55  | 3.89     |
| CPN3A    | -6.81  | -6.70  | -5.77 | -2.12 | -0.77  | -0.65  | 3.65     |
| CPN3B    | -6.69  | -6.61  | -5.66 | -1.77 | -0.57  | -0.36  | 3.89     |
| CPN3C    | -6.92  | -6.83  | -5.85 | -1.97 | -0.80  | -0.32  | 3.88     |
| CPN3D    | -6.97  | -6.93  | -5.91 | -2.53 | -1.41  | -0.88  | 3.38     |

SIT6. Frontier molecular orbital energies (eV) of excited state ( $S_1$ ) CPN derivatives computed at the PBE1PBE/6-311++G(d,p)level.

| Molecule | HOMO-2 | HOMO-1 | HOMO  | LUMO  | LUMO+1 | LUMO+2 | Band gap |
|----------|--------|--------|-------|-------|--------|--------|----------|
| CPN      | -7.39  | -6.31  | -5.32 | -1.22 | 0.01   | 0.93   | 4.10     |
| CPN1     | -6.30  | -5.90  | -4.91 | -1.52 | -0.15  | 0.29   | 3.39     |
| CPN1A    | -6.35  | -6.01  | -5.00 | -1.72 | -0.20  | -0.20  | 3.28     |
| CPN1B    | -6.87  | -5.92  | -4.85 | -1.54 | 0.09   | 0.39   | 3.31     |
| CPN1C    | -7.06  | -6.06  | -5.02 | -1.61 | 0.02   | 0.27   | 3.41     |
| CPN1D    | -7.06  | -6.09  | -4.96 | -3.24 | -1.10  | 0.06   | 1.72     |
| CPN2     | -6.25  | -5.82  | -4.78 | -1.73 | 0.12   | 0.41   | 3.05     |
| CPN2A    | -6.39  | -5.94  | -4.85 | -1.92 | 0.06   | 0.33   | 2.93     |
| CPN2B    | -6.88  | -5.91  | -4.84 | -1.67 | 0.19   | 0.40   | 3.17     |
| CPN2C    | -7.02  | -6.05  | -5.04 | -1.69 | 0.01   | 0.33   | 3.35     |
| CPN2D    | -6.95  | -6.11  | -4.95 | -3.31 | 1.11   | 0.04   | 1.64     |
| CPN3     | -6.37  | -6.26  | -4.88 | -1.75 | -0.10  | 0.03   | 3.13     |
| CPN3A    | -6.49  | -6.41  | -4.96 | -1.93 | -0.13  | 0.12   | 3.03     |
| CPN3B    | -6.46  | -6.39  | -4.84 | -1.76 | -0.03  | -0.27  | 3.08     |
| CPN3C    | -6.67  | -6.48  | -5.02 | -1.83 | -0.23  | -0.26  | 3.19     |
| CPN3D    | -6.62  | -6.51  | -4.90 | -3.31 | -1.18  | -0.22  | 1.59     |

### Effect of electron donating groups (EDG) on CPNs

Among the reported CPNs the CPN1C shows better optoelectronic properties and hence we have chosen CPN1C as a reference molecule. In order to understand the influence of electron donating group, we have substituted different EDGs (based on reviewers suggestion) such as  $-\text{OCH}_3$ ,  $-\text{NHCOCH}_3$  and  $-\text{CH}_3$  in the place of  $-\text{N}(\text{CH}_3)_2$  in CPN1C. The molecules with  $-\text{OCH}_3$ ,  $-\text{NHCOCH}_3$  and  $-\text{CH}_3$  groups are denoted as CPN1CA, CPN1CB and CPN1CC respectively and  $-\text{CN}$  is common acceptor in all the cases. The computed results show that these groups do affect the energy gap, absorption and emission wavelengths. When the electron donating power decreases the energy gap of the molecules increases (see Table given below). Further the absorption wavelength for CPN1C, CPN1CA, CPN1CB, and CPN1CC's are predicted at 391, 341, 333 and 314 nm respectively and the emission wavelengths are predicted at 433, 384, 377 and 361 nm respectively. This clearly shows that when electron donating power decreases the absorption and emission wavelength of the molecules decreases.

SIT7. The computed HOMO (eV), LUMO (eV), band gap (eV), absorption ( $\lambda_{\text{max}}$ , nm) and emission wavelength ( $\lambda_{\text{max}}$ , nm) of the molecules in DCM medium.

| Molecules | HOMO (eV) | LUMO (eV) | band gap (eV) | absorption wavelength(nm) | Emission wavelength(nm) |
|-----------|-----------|-----------|---------------|---------------------------|-------------------------|
| CPN1C     | -5.45     | -1.77     | 3.68          | 391                       | 433                     |
| CPN1CA    | -6.03     | -1.99     | 4.04          | 341                       | 384                     |
| CPN1CB    | -6.15     | -2.01     | 4.14          | 333                       | 377                     |
| CPN1CC    | -6.33     | -2.00     | 4.33          | 314                       | 361                     |

### Effect of electron withdrawing groups (EWG) on CPNs

The effect of electron withdrawing groups has been discussed in Page14 of the supporting information. For example CPN1 derivatives such as CPN1, CPN1A, CPN1B, CPN1C and CPN1D have  $-\text{COCH}_3$ ,  $-\text{CHO}$ ,  $-\text{COOH}$ ,  $-\text{CN}$  and  $-\text{NO}_2$  acceptor groups respectively and  $-\text{N}(\text{CH}_3)_2$  is a common donor in all the molecules (please see figure1). This clearly shows that when the electron withdrawing power decreases, the band gap increases and the absorption and emission wavelength decreases.

## Coordinates of the chosen molecules

### CPN1

|   |              |              |              |
|---|--------------|--------------|--------------|
| 6 | 2.600388000  | -0.422358000 | 0.053028000  |
| 6 | 1.465327000  | 0.384487000  | -0.029775000 |
| 6 | 0.151541000  | -0.143169000 | 0.026449000  |
| 6 | -0.014883000 | -1.563035000 | 0.108850000  |
| 6 | 1.147782000  | -2.368974000 | 0.187602000  |
| 6 | 2.408147000  | -1.833206000 | 0.165827000  |
| 1 | 1.584219000  | 1.447095000  | -0.170839000 |
| 6 | -1.025799000 | 0.681826000  | -0.059138000 |
| 6 | -1.312379000 | -2.133359000 | 0.082465000  |
| 1 | 1.028686000  | -3.445878000 | 0.252768000  |
| 1 | 3.259012000  | -2.497167000 | 0.222489000  |
| 6 | -2.415452000 | -1.330580000 | -0.048031000 |
| 6 | -2.271368000 | 0.079131000  | -0.131650000 |
| 1 | -1.411027000 | -3.212603000 | 0.157983000  |
| 6 | -3.639333000 | 0.717266000  | -0.266598000 |
| 6 | -4.606254000 | -0.394633000 | 0.201662000  |
| 6 | -3.876330000 | -1.717452000 | -0.126111000 |
| 1 | -3.812754000 | 0.975707000  | -1.317374000 |
| 1 | -3.745043000 | 1.647523000  | 0.293971000  |
| 1 | -5.589633000 | -0.324026000 | -0.267746000 |
| 1 | -4.751800000 | -0.319331000 | 1.283958000  |
| 1 | -4.141035000 | -2.532747000 | 0.552044000  |
| 1 | -4.121914000 | -2.052674000 | -1.142190000 |
| 6 | -0.972403000 | 2.179512000  | -0.031650000 |
| 8 | -1.636688000 | 2.846732000  | -0.804020000 |
| 6 | -0.171810000 | 2.878918000  | 1.061187000  |
| 1 | -0.878207000 | 3.479104000  | 1.641850000  |
| 1 | 0.351031000  | 2.193950000  | 1.726800000  |
| 1 | 0.540317000  | 3.575590000  | 0.610533000  |
| 7 | 3.884828000  | 0.111644000  | 0.037307000  |
| 6 | 4.053617000  | 1.527093000  | -0.247848000 |
| 1 | 5.106924000  | 1.787053000  | -0.147570000 |
| 1 | 3.723507000  | 1.802239000  | -1.261161000 |
| 1 | 3.495562000  | 2.134178000  | 0.469426000  |
| 6 | 5.021083000  | -0.755014000 | -0.245729000 |
| 1 | 4.965071000  | -1.221715000 | -1.240051000 |
| 1 | 5.934328000  | -0.162894000 | -0.198063000 |
| 1 | 5.111225000  | -1.547496000 | 0.500941000  |

### CPN1A

|   |              |              |              |
|---|--------------|--------------|--------------|
| 6 | -2.605233000 | -0.243194000 | -0.078163000 |
| 6 | -1.472257000 | 0.571920000  | -0.038604000 |
| 6 | -0.156624000 | 0.047952000  | -0.026661000 |

|   |              |              |              |
|---|--------------|--------------|--------------|
| 6 | 0.006852000  | -1.375887000 | -0.013250000 |
| 6 | -1.152853000 | -2.190066000 | -0.038245000 |
| 6 | -2.413657000 | -1.658656000 | -0.070727000 |
| 1 | -1.606561000 | 1.640211000  | -0.003693000 |
| 6 | 1.032101000  | 0.874385000  | -0.001340000 |
| 6 | 1.301592000  | -1.945115000 | 0.042242000  |
| 1 | -1.029093000 | -3.268232000 | -0.024257000 |
| 1 | -3.263632000 | -2.325927000 | -0.085319000 |
| 6 | 2.415276000  | -1.143903000 | 0.079605000  |
| 6 | 2.283376000  | 0.265043000  | 0.052934000  |
| 1 | 1.394276000  | -3.027641000 | 0.054518000  |
| 6 | 3.656148000  | 0.901784000  | 0.080202000  |
| 6 | 4.609301000  | -0.259877000 | -0.287298000 |
| 6 | 3.872395000  | -1.542674000 | 0.159120000  |
| 1 | 3.858440000  | 1.284943000  | 1.087938000  |
| 1 | 3.739942000  | 1.762987000  | -0.582375000 |
| 1 | 5.595485000  | -0.155873000 | 0.169506000  |
| 1 | 4.751294000  | -0.281837000 | -1.372223000 |
| 1 | 4.112868000  | -2.412175000 | -0.457946000 |
| 1 | 4.133786000  | -1.801380000 | 1.193389000  |
| 6 | 0.934196000  | 2.341660000  | -0.077611000 |
| 8 | 1.844838000  | 3.123201000  | 0.132992000  |
| 7 | -3.885405000 | 0.289233000  | -0.132609000 |
| 6 | -4.065028000 | 1.724367000  | 0.012783000  |
| 1 | -5.118183000 | 1.967136000  | -0.122777000 |
| 1 | -3.749033000 | 2.095228000  | 0.999159000  |
| 1 | -3.501374000 | 2.266100000  | -0.751878000 |
| 6 | -5.037912000 | -0.561094000 | 0.130749000  |
| 1 | -5.027260000 | -0.990931000 | 1.142565000  |
| 1 | -5.944592000 | 0.032907000  | 0.023766000  |
| 1 | -5.100612000 | -1.380586000 | -0.589981000 |
| 1 | -0.052653000 | 2.744960000  | -0.370470000 |

## CPN1B

|   |              |              |              |
|---|--------------|--------------|--------------|
| 6 | -2.613487000 | -0.420320000 | -0.060651000 |
| 6 | -1.483825000 | 0.397811000  | -0.026066000 |
| 6 | -0.166577000 | -0.120481000 | -0.027121000 |
| 6 | -0.001513000 | -1.546202000 | -0.034762000 |
| 6 | -1.159794000 | -2.362203000 | -0.058172000 |
| 6 | -2.422325000 | -1.834584000 | -0.067985000 |
| 1 | -1.606473000 | 1.465315000  | -0.013305000 |
| 6 | 1.028064000  | 0.696450000  | 0.024452000  |
| 6 | 1.289776000  | -2.123746000 | -0.003678000 |
| 1 | -1.031554000 | -3.439912000 | -0.059918000 |
| 1 | -3.270672000 | -2.504131000 | -0.081291000 |
| 6 | 2.404198000  | -1.328676000 | 0.047221000  |
| 6 | 2.274902000  | 0.082304000  | 0.071438000  |



|   |              |              |              |
|---|--------------|--------------|--------------|
| 1 | 1.376939000  | -3.206601000 | -0.018833000 |
| 6 | 3.655568000  | 0.706139000  | 0.134495000  |
| 6 | 4.596220000  | -0.439307000 | -0.303740000 |
| 6 | 3.860390000  | -1.734342000 | 0.104116000  |
| 1 | 3.862457000  | 1.019938000  | 1.164014000  |
| 1 | 3.754085000  | 1.603826000  | -0.476183000 |
| 1 | 5.591881000  | -0.357805000 | 0.137065000  |
| 1 | 4.714894000  | -0.416454000 | -1.391580000 |
| 1 | 4.093957000  | -2.583297000 | -0.543451000 |
| 1 | 4.129147000  | -2.027410000 | 1.127345000  |
| 6 | 1.024360000  | 2.182013000  | 0.049367000  |
| 8 | 1.873514000  | 2.867484000  | 0.577666000  |
| 7 | -3.896232000 | 0.113501000  | -0.106983000 |
| 6 | -4.069665000 | 1.548548000  | 0.049450000  |
| 1 | -5.120484000 | 1.797116000  | -0.096531000 |
| 1 | -3.762015000 | 1.910299000  | 1.042412000  |
| 1 | -3.493259000 | 2.091038000  | -0.703685000 |
| 6 | -5.040376000 | -0.729269000 | 0.210530000  |
| 1 | -5.005633000 | -1.128126000 | 1.234981000  |
| 1 | -5.950629000 | -0.139916000 | 0.105781000  |
| 1 | -5.118978000 | -1.570555000 | -0.482547000 |
| 8 | -0.008858000 | 2.772612000  | -0.617669000 |
| 1 | 0.137203000  | 3.726590000  | -0.528736000 |

## CPN1C

|   |              |              |              |
|---|--------------|--------------|--------------|
| 6 | -2.519681000 | -0.293561000 | -0.051804000 |
| 6 | -1.408383000 | 0.551258000  | -0.045521000 |
| 6 | -0.092043000 | 0.046473000  | -0.053276000 |
| 6 | 0.130458000  | -1.366771000 | -0.052618000 |
| 6 | -1.009900000 | -2.209063000 | -0.039294000 |
| 6 | -2.283569000 | -1.704909000 | -0.036479000 |
| 1 | -1.536126000 | 1.624043000  | -0.035222000 |
| 6 | 1.061322000  | 0.907635000  | -0.051544000 |
| 6 | 1.450459000  | -1.883080000 | -0.055216000 |
| 1 | -0.862706000 | -3.284238000 | -0.029486000 |
| 1 | -3.116174000 | -2.394077000 | -0.024222000 |
| 6 | 2.530845000  | -1.034355000 | -0.054925000 |
| 6 | 2.335707000  | 0.366758000  | -0.050729000 |
| 1 | 1.588657000  | -2.960520000 | -0.053219000 |
| 6 | 3.666687000  | 1.081143000  | -0.060131000 |
| 6 | 4.662214000  | -0.020738000 | 0.377090000  |
| 6 | 4.011186000  | -1.351170000 | -0.073489000 |
| 1 | 3.684879000  | 1.961995000  | 0.585337000  |
| 1 | 3.889014000  | 1.430696000  | -1.076544000 |
| 1 | 4.753366000  | -0.012656000 | 1.467212000  |
| 1 | 5.661214000  | 0.125278000  | -0.037821000 |
| 1 | 4.327709000  | -1.612171000 | -1.091422000 |

|   |              |              |              |
|---|--------------|--------------|--------------|
| 1 | 4.277720000  | -2.193441000 | 0.569812000  |
| 7 | -3.811628000 | 0.202289000  | -0.085063000 |
| 6 | -4.024239000 | 1.635950000  | 0.044730000  |
| 1 | -5.084891000 | 1.850931000  | -0.078051000 |
| 1 | -3.701398000 | 2.024872000  | 1.021127000  |
| 1 | -3.483308000 | 2.180777000  | -0.733363000 |
| 6 | -4.938983000 | -0.677041000 | 0.189552000  |
| 1 | -4.906218000 | -1.106766000 | 1.200840000  |
| 1 | -5.861268000 | -0.105878000 | 0.093545000  |
| 1 | -4.988793000 | -1.497582000 | -0.531292000 |
| 6 | 0.891751000  | 2.324544000  | -0.046118000 |
| 7 | 0.750963000  | 3.473469000  | -0.041879000 |

**CPN1D**

|   |              |              |              |
|---|--------------|--------------|--------------|
| 6 | -2.619602000 | -0.391831000 | -0.044857000 |
| 6 | -1.489135000 | 0.428742000  | -0.041192000 |
| 6 | -0.180364000 | -0.099934000 | -0.025230000 |
| 6 | -0.005988000 | -1.525135000 | -0.002688000 |
| 6 | -1.166649000 | -2.338966000 | -0.000201000 |
| 6 | -2.427154000 | -1.807650000 | -0.015318000 |
| 1 | -1.605690000 | 1.497472000  | -0.074615000 |
| 6 | 1.022220000  | 0.687689000  | 0.017223000  |
| 6 | 1.287975000  | -2.096034000 | 0.023305000  |
| 1 | -1.041294000 | -3.416546000 | 0.022536000  |
| 1 | -3.277264000 | -2.475027000 | -0.006455000 |
| 6 | 2.404751000  | -1.299098000 | 0.045697000  |
| 6 | 2.276758000  | 0.110867000  | 0.059330000  |
| 1 | 1.378209000  | -3.178395000 | 0.022869000  |
| 6 | 3.650056000  | 0.746316000  | 0.097069000  |
| 6 | 4.586416000  | -0.399122000 | -0.352639000 |
| 6 | 3.864746000  | -1.695720000 | 0.077969000  |
| 1 | 3.870159000  | 1.063954000  | 1.122056000  |
| 1 | 3.731778000  | 1.640958000  | -0.521933000 |
| 1 | 5.589045000  | -0.309352000 | 0.069594000  |
| 1 | 4.684381000  | -0.382305000 | -1.442288000 |
| 1 | 4.090456000  | -2.546354000 | -0.569755000 |
| 1 | 4.154203000  | -1.981829000 | 1.097264000  |
| 7 | -3.895152000 | 0.139661000  | -0.093160000 |
| 6 | -4.073513000 | 1.581458000  | -0.003980000 |
| 1 | -5.128640000 | 1.817587000  | -0.134328000 |
| 1 | -3.743941000 | 1.987642000  | 0.962800000  |
| 1 | -3.517808000 | 2.092540000  | -0.794317000 |
| 6 | -5.052160000 | -0.708980000 | 0.151984000  |
| 1 | -5.044132000 | -1.156215000 | 1.155819000  |
| 1 | -5.955392000 | -0.108311000 | 0.056728000  |
| 1 | -5.118822000 | -1.516161000 | -0.583227000 |
| 7 | 0.956396000  | 2.154448000  | 0.016419000  |

|   |             |             |              |
|---|-------------|-------------|--------------|
| 8 | 1.771835000 | 2.760080000 | 0.707850000  |
| 8 | 0.107654000 | 2.709415000 | -0.678397000 |

**CPN2**

|   |              |              |              |
|---|--------------|--------------|--------------|
| 6 | -2.303413000 | 1.298066000  | -0.002863000 |
| 6 | -0.956332000 | 1.551690000  | -0.044225000 |
| 6 | 0.007078000  | 0.510069000  | 0.004197000  |
| 6 | -0.491086000 | -0.829726000 | 0.083411000  |
| 6 | -1.885911000 | -1.069079000 | 0.118303000  |
| 6 | -2.813846000 | -0.032778000 | 0.093568000  |
| 1 | -0.625424000 | 2.577218000  | -0.139188000 |
| 6 | 1.423805000  | 0.739748000  | -0.008273000 |
| 6 | 0.433549000  | -1.911034000 | 0.103034000  |
| 1 | -2.209318000 | -2.100016000 | 0.165703000  |
| 6 | 1.780083000  | -1.667814000 | 0.065234000  |
| 6 | 2.285204000  | -0.339416000 | 0.027087000  |
| 1 | 0.052260000  | -2.927521000 | 0.135539000  |
| 6 | 3.803437000  | -0.381536000 | -0.027963000 |
| 6 | 4.101606000  | -1.825468000 | -0.494752000 |
| 6 | 2.921917000  | -2.660945000 | 0.050161000  |
| 1 | 4.226884000  | -0.219006000 | 0.972162000  |
| 1 | 4.239342000  | 0.371193000  | -0.688769000 |
| 1 | 5.075123000  | -2.186288000 | -0.156218000 |
| 1 | 4.096017000  | -1.860250000 | -1.588309000 |
| 1 | 2.710335000  | -3.547622000 | -0.552269000 |
| 1 | 3.133421000  | -3.007243000 | 1.070258000  |
| 6 | 1.951911000  | 2.149219000  | -0.099675000 |
| 8 | 1.625867000  | 2.889861000  | -1.006280000 |
| 6 | 2.849200000  | 2.638324000  | 1.020407000  |
| 1 | 2.233192000  | 2.767512000  | 1.917978000  |
| 1 | 3.628223000  | 1.918829000  | 1.273852000  |
| 1 | 3.290784000  | 3.596989000  | 0.748005000  |
| 1 | -2.983626000 | 2.136928000  | -0.050574000 |
| 7 | -4.184957000 | -0.260480000 | 0.175591000  |
| 6 | -4.668997000 | -1.627992000 | 0.088369000  |
| 1 | -5.747974000 | -1.634146000 | 0.241041000  |
| 1 | -4.452932000 | -2.098213000 | -0.883619000 |
| 1 | -4.222195000 | -2.245709000 | 0.871567000  |
| 6 | -5.111450000 | 0.787534000  | -0.230996000 |
| 1 | -5.002185000 | 1.068559000  | -1.288954000 |
| 1 | -6.130499000 | 0.434621000  | -0.074780000 |
| 1 | -4.984214000 | 1.685469000  | 0.377532000  |

**CPN2A**

|   |             |             |              |
|---|-------------|-------------|--------------|
| 6 | 2.239729000 | 1.269531000 | -0.024404000 |
|---|-------------|-------------|--------------|

|   |              |              |              |
|---|--------------|--------------|--------------|
| 6 | 0.919596000  | 1.648885000  | -0.015190000 |
| 6 | -0.131921000 | 0.696996000  | -0.043695000 |
| 6 | 0.249785000  | -0.682401000 | -0.073164000 |
| 6 | 1.615579000  | -1.050991000 | -0.078057000 |
| 6 | 2.633498000  | -0.101240000 | -0.069832000 |
| 1 | 0.670665000  | 2.698781000  | 0.015927000  |
| 6 | -1.531546000 | 1.042953000  | -0.032261000 |
| 6 | -0.762280000 | -1.682577000 | -0.090907000 |
| 1 | 1.843390000  | -2.108255000 | -0.090533000 |
| 6 | -2.087765000 | -1.337043000 | -0.073477000 |
| 6 | -2.480170000 | 0.024832000  | -0.035971000 |
| 1 | -0.463375000 | -2.726786000 | -0.114888000 |
| 6 | -3.999870000 | 0.106330000  | -0.027633000 |
| 6 | -4.435660000 | -1.318597000 | 0.388875000  |
| 6 | -3.299893000 | -2.241579000 | -0.103499000 |
| 1 | -4.367502000 | 0.341957000  | -1.034610000 |
| 1 | -4.400564000 | 0.868413000  | 0.642485000  |
| 1 | -5.413639000 | -1.592439000 | -0.011668000 |
| 1 | -4.498999000 | -1.371480000 | 1.479895000  |
| 1 | -3.180809000 | -3.137863000 | 0.510054000  |
| 1 | -3.490772000 | -2.577867000 | -1.130619000 |
| 6 | -2.028403000 | 2.432827000  | -0.024078000 |
| 8 | -1.369595000 | 3.456182000  | -0.032122000 |
| 1 | 2.991601000  | 2.046037000  | 0.002815000  |
| 7 | 3.977922000  | -0.452453000 | -0.120748000 |
| 6 | 4.339009000  | -1.853153000 | 0.017607000  |
| 1 | 5.415512000  | -1.958093000 | -0.113888000 |
| 1 | 4.066879000  | -2.270107000 | 0.999577000  |
| 1 | 3.852934000  | -2.455265000 | -0.754496000 |
| 6 | 4.992165000  | 0.528308000  | 0.241432000  |
| 1 | 4.905017000  | 0.868445000  | 1.283870000  |
| 1 | 5.976444000  | 0.079935000  | 0.109692000  |
| 1 | 4.945779000  | 1.403890000  | -0.409909000 |
| 1 | -3.132371000 | 2.509937000  | -0.015962000 |

## CPN2B

|   |              |              |              |
|---|--------------|--------------|--------------|
| 6 | 2.320084000  | 1.278603000  | -0.113658000 |
| 6 | 0.976242000  | 1.556353000  | -0.090655000 |
| 6 | -0.008737000 | 0.534239000  | -0.048520000 |
| 6 | 0.478368000  | -0.813693000 | -0.039468000 |
| 6 | 1.869050000  | -1.077567000 | -0.050099000 |
| 6 | 2.814727000  | -0.059361000 | -0.099360000 |
| 1 | 0.668447000  | 2.590546000  | -0.095696000 |
| 6 | -1.431965000 | 0.762355000  | -0.052020000 |
| 6 | -0.449724000 | -1.891143000 | -0.019499000 |
| 1 | 2.173308000  | -2.115187000 | -0.028034000 |
| 6 | -1.795936000 | -1.648690000 | -0.031413000 |

|   |              |              |              |
|---|--------------|--------------|--------------|
| 6 | -2.297759000 | -0.320820000 | -0.059029000 |
| 1 | -0.068810000 | -2.908217000 | 0.001039000  |
| 6 | -3.812837000 | -0.356709000 | -0.073918000 |
| 6 | -4.146074000 | -1.788737000 | 0.403655000  |
| 6 | -2.936189000 | -2.643213000 | -0.034420000 |
| 1 | -4.170488000 | -0.186757000 | -1.096015000 |
| 1 | -4.272564000 | 0.420129000  | 0.537749000  |
| 1 | -5.093669000 | -2.156502000 | 0.004774000  |
| 1 | -4.221516000 | -1.799917000 | 1.495529000  |
| 1 | -2.756181000 | -3.502098000 | 0.616896000  |
| 1 | -3.085330000 | -3.034731000 | -1.048981000 |
| 1 | 3.010003000  | 2.110396000  | -0.145355000 |
| 7 | 4.181829000  | -0.313404000 | -0.156930000 |
| 6 | 4.644325000  | -1.676091000 | 0.046113000  |
| 1 | 5.724398000  | -1.710281000 | -0.093805000 |
| 1 | 4.411317000  | -2.061808000 | 1.050717000  |
| 1 | 4.196171000  | -2.349316000 | -0.689166000 |
| 6 | 5.123128000  | 0.752669000  | 0.157279000  |
| 1 | 5.016348000  | 1.128917000  | 1.185587000  |
| 1 | 6.137037000  | 0.372185000  | 0.036555000  |
| 1 | 5.010624000  | 1.594578000  | -0.529486000 |
| 6 | -2.055884000 | 2.113731000  | -0.058875000 |
| 8 | -3.115339000 | 2.382154000  | -0.581039000 |
| 8 | -1.361286000 | 3.066690000  | 0.622509000  |
| 1 | -1.883826000 | 3.879587000  | 0.547763000  |

## CPN2C

|   |              |              |              |
|---|--------------|--------------|--------------|
| 6 | 2.228324000  | 1.334112000  | -0.073357000 |
| 6 | 0.903170000  | 1.686272000  | -0.039333000 |
| 6 | -0.122178000 | 0.712053000  | -0.002299000 |
| 6 | 0.265785000  | -0.663141000 | 0.005301000  |
| 6 | 1.638177000  | -1.004479000 | -0.027567000 |
| 6 | 2.638362000  | -0.035512000 | -0.081336000 |
| 1 | 0.634112000  | 2.736605000  | -0.037109000 |
| 6 | -1.517033000 | 1.043149000  | 0.029427000  |
| 6 | -0.745231000 | -1.666156000 | 0.047975000  |
| 1 | 1.888353000  | -2.056431000 | -0.010421000 |
| 6 | -2.071578000 | -1.319164000 | 0.076543000  |
| 6 | -2.469036000 | 0.041331000  | 0.065580000  |
| 1 | -0.445079000 | -2.709900000 | 0.051137000  |
| 6 | -3.974822000 | 0.151522000  | 0.109069000  |
| 6 | -4.441939000 | -1.265386000 | -0.304713000 |
| 6 | -3.295406000 | -2.208894000 | 0.132886000  |
| 1 | -4.366666000 | 0.940471000  | -0.536618000 |
| 1 | -4.300555000 | 0.388421000  | 1.130151000  |
| 1 | -4.550297000 | -1.306569000 | -1.392512000 |
| 1 | -5.404607000 | -1.536485000 | 0.132528000  |

|   |              |              |              |
|---|--------------|--------------|--------------|
| 1 | -3.453289000 | -2.560048000 | 1.160501000  |
| 1 | -3.208228000 | -3.096345000 | -0.498628000 |
| 1 | 2.969169000  | 2.120761000  | -0.095231000 |
| 7 | 3.984900000  | -0.366283000 | -0.156457000 |
| 6 | 4.376042000  | -1.755761000 | 0.012287000  |
| 1 | 5.451059000  | -1.844342000 | -0.139831000 |
| 1 | 4.133293000  | -2.148330000 | 1.011395000  |
| 1 | 3.884958000  | -2.389115000 | -0.731414000 |
| 6 | 4.996181000  | 0.647926000  | 0.108831000  |
| 1 | 4.937681000  | 1.052521000  | 1.129693000  |
| 1 | 5.981822000  | 0.203959000  | -0.025654000 |
| 1 | 4.917087000  | 1.479594000  | -0.595454000 |
| 6 | -1.927028000 | 2.412037000  | 0.018669000  |
| 7 | -2.264837000 | 3.518536000  | 0.010697000  |

**CPN2D**

|   |              |              |              |
|---|--------------|--------------|--------------|
| 6 | 2.326427000  | 1.280581000  | -0.069073000 |
| 6 | 0.987178000  | 1.574178000  | -0.040134000 |
| 6 | 0.001598000  | 0.554189000  | -0.025518000 |
| 6 | 0.465035000  | -0.801660000 | -0.040163000 |
| 6 | 1.851889000  | -1.077605000 | -0.056683000 |
| 6 | 2.806403000  | -0.064442000 | -0.084731000 |
| 1 | 0.684494000  | 2.610636000  | -0.012259000 |
| 6 | -1.411755000 | 0.768996000  | -0.035222000 |
| 6 | -0.482616000 | -1.864140000 | -0.032067000 |
| 1 | 2.148427000  | -2.117463000 | -0.055267000 |
| 6 | -1.826753000 | -1.603942000 | -0.037395000 |
| 6 | -2.313740000 | -0.270245000 | -0.054408000 |
| 1 | -0.117474000 | -2.886728000 | -0.022184000 |
| 6 | -3.826296000 | -0.273090000 | -0.065096000 |
| 6 | -4.179640000 | -1.702491000 | 0.408713000  |
| 6 | -2.986341000 | -2.576736000 | -0.039080000 |
| 1 | -4.181861000 | -0.093011000 | -1.085652000 |
| 1 | -4.267843000 | 0.508819000  | 0.554915000  |
| 1 | -5.134742000 | -2.051366000 | 0.011726000  |
| 1 | -4.250591000 | -1.716618000 | 1.500462000  |
| 1 | -2.819219000 | -3.440322000 | 0.608939000  |
| 1 | -3.146473000 | -2.961782000 | -1.054156000 |
| 1 | 3.026394000  | 2.104158000  | -0.076763000 |
| 7 | 4.166805000  | -0.329103000 | -0.142695000 |
| 6 | 4.622248000  | -1.700139000 | 0.016892000  |
| 1 | 5.702967000  | -1.734533000 | -0.114842000 |
| 1 | 4.379642000  | -2.116180000 | 1.006273000  |
| 1 | 4.176990000  | -2.347495000 | -0.743597000 |
| 6 | 5.125166000  | 0.732107000  | 0.135818000  |
| 1 | 5.032350000  | 1.133314000  | 1.155211000  |
| 1 | 6.132474000  | 0.335053000  | 0.016350000  |

|   |              |             |              |
|---|--------------|-------------|--------------|
| 1 | 5.017065000  | 1.558909000 | -0.570391000 |
| 7 | -1.954638000 | 2.138245000 | -0.009932000 |
| 8 | -2.925501000 | 2.373941000 | -0.722323000 |
| 8 | -1.427074000 | 2.963215000 | 0.729637000  |

**CPN3**

|   |              |              |              |
|---|--------------|--------------|--------------|
| 6 | 1.734986000  | -2.609644000 | -0.316562000 |
| 6 | 0.394316000  | -2.323686000 | -0.239643000 |
| 6 | -0.054855000 | -0.981671000 | -0.110641000 |
| 6 | 0.921034000  | 0.069353000  | -0.104775000 |
| 6 | 2.321100000  | -0.262866000 | -0.105021000 |
| 6 | 2.700283000  | -1.586417000 | -0.229832000 |
| 1 | -0.323898000 | -3.129176000 | -0.317624000 |
| 6 | -1.451611000 | -0.643140000 | -0.077954000 |
| 6 | 0.482622000  | 1.419744000  | -0.154744000 |
| 6 | -0.855480000 | 1.714794000  | -0.176524000 |
| 6 | -1.830219000 | 0.685192000  | -0.133875000 |
| 1 | 1.224973000  | 2.205870000  | -0.211463000 |
| 6 | -3.216377000 | 1.295700000  | -0.161850000 |
| 6 | -2.967061000 | 2.771175000  | 0.227069000  |
| 6 | -1.528935000 | 3.068158000  | -0.256360000 |
| 1 | -3.930159000 | 0.789897000  | 0.490805000  |
| 1 | -3.623562000 | 1.217567000  | -1.176022000 |
| 1 | -3.012256000 | 2.874667000  | 1.315862000  |
| 1 | -3.707709000 | 3.450893000  | -0.198872000 |
| 1 | -1.535772000 | 3.420246000  | -1.295981000 |
| 1 | -1.024039000 | 3.833995000  | 0.337454000  |
| 6 | -2.531426000 | -1.681122000 | 0.039267000  |
| 8 | -3.518603000 | -1.636259000 | -0.670489000 |
| 6 | -2.444929000 | -2.726256000 | 1.144179000  |
| 1 | -1.521319000 | -2.681980000 | 1.718845000  |
| 1 | -3.292404000 | -2.555653000 | 1.814865000  |
| 1 | -2.571664000 | -3.725147000 | 0.718884000  |
| 1 | 2.062057000  | -3.637014000 | -0.433351000 |
| 1 | 3.749207000  | -1.852400000 | -0.254153000 |
| 7 | 3.268473000  | 0.793197000  | -0.017422000 |
| 6 | 4.581823000  | 0.544949000  | -0.595740000 |
| 1 | 5.115418000  | 1.495864000  | -0.672835000 |
| 1 | 5.206320000  | -0.138367000 | 0.004648000  |
| 1 | 4.475715000  | 0.129703000  | -1.598923000 |
| 6 | 3.372847000  | 1.422467000  | 1.302865000  |
| 1 | 3.933236000  | 0.792071000  | 2.013118000  |
| 1 | 3.892385000  | 2.380342000  | 1.210742000  |
| 1 | 2.384277000  | 1.605939000  | 1.720711000  |

### CPN3A

|   |              |              |              |
|---|--------------|--------------|--------------|
| 6 | -1.936455000 | 2.585447000  | -0.083230000 |
| 6 | -0.569409000 | 2.474136000  | -0.011109000 |
| 6 | 0.055454000  | 1.197185000  | 0.005829000  |
| 6 | -0.780637000 | 0.034371000  | -0.078466000 |
| 6 | -2.212525000 | 0.177129000  | -0.070786000 |
| 6 | -2.762216000 | 1.444462000  | -0.097576000 |
| 1 | 0.024614000  | 3.376771000  | 0.003943000  |
| 6 | 1.489903000  | 1.027169000  | 0.046446000  |
| 6 | -0.175530000 | -1.241054000 | -0.226823000 |
| 6 | 1.189284000  | -1.375496000 | -0.223739000 |
| 6 | 2.029834000  | -0.248625000 | -0.060750000 |
| 1 | -0.815966000 | -2.102059000 | -0.372810000 |
| 6 | 3.477475000  | -0.688144000 | -0.053936000 |
| 6 | 3.396393000  | -2.217869000 | 0.163745000  |
| 6 | 2.015844000  | -2.631024000 | -0.394405000 |
| 1 | 4.076426000  | -0.170349000 | 0.695199000  |
| 1 | 3.936305000  | -0.442092000 | -1.019118000 |
| 1 | 3.434147000  | -2.434357000 | 1.235853000  |
| 1 | 4.222299000  | -2.754234000 | -0.307255000 |
| 1 | 2.087515000  | -2.885745000 | -1.459598000 |
| 1 | 1.587327000  | -3.498506000 | 0.113380000  |
| 6 | 2.381755000  | 2.188685000  | 0.237767000  |
| 8 | 3.590858000  | 2.171346000  | 0.100394000  |
| 1 | -2.393692000 | 3.568440000  | -0.111279000 |
| 1 | -3.836677000 | 1.573863000  | -0.112812000 |
| 7 | -3.010312000 | -0.998967000 | -0.070494000 |
| 6 | -4.346155000 | -0.884011000 | -0.640078000 |
| 1 | -4.748854000 | -1.888855000 | -0.791179000 |
| 1 | -5.054553000 | -0.335728000 | 0.003772000  |
| 1 | -4.297429000 | -0.385556000 | -1.609213000 |
| 6 | -3.029502000 | -1.732140000 | 1.199863000  |
| 1 | -3.663944000 | -1.232721000 | 1.950416000  |
| 1 | -3.422319000 | -2.738916000 | 1.033305000  |
| 1 | -2.024497000 | -1.817910000 | 1.609927000  |
| 1 | 1.893521000  | 3.128641000  | 0.551262000  |

### CPN3B

|   |              |              |              |
|---|--------------|--------------|--------------|
| 6 | 1.767117000  | -2.614659000 | -0.207436000 |
| 6 | 0.422867000  | -2.349493000 | -0.122249000 |
| 6 | -0.049515000 | -1.010483000 | -0.053922000 |
| 6 | 0.916998000  | 0.051265000  | -0.091338000 |
| 6 | 2.322036000  | -0.258981000 | -0.096672000 |
| 6 | 2.720715000  | -1.578221000 | -0.178729000 |
| 1 | -0.280347000 | -3.167149000 | -0.111817000 |
| 6 | -1.450783000 | -0.667439000 | -0.027504000 |



|   |              |              |              |
|---|--------------|--------------|--------------|
| 6 | 0.473016000  | 1.396975000  | -0.172893000 |
| 6 | -0.864327000 | 1.691395000  | -0.176295000 |
| 6 | -1.834728000 | 0.661931000  | -0.097164000 |
| 1 | 1.214287000  | 2.180995000  | -0.263866000 |
| 6 | -3.221067000 | 1.273225000  | -0.114392000 |
| 6 | -2.966857000 | 2.757676000  | 0.232941000  |
| 6 | -1.537127000 | 3.043245000  | -0.278012000 |
| 1 | -3.920801000 | 0.783144000  | 0.563547000  |
| 1 | -3.648829000 | 1.167303000  | -1.117677000 |
| 1 | -2.996958000 | 2.888230000  | 1.319232000  |
| 1 | -3.714889000 | 3.425155000  | -0.199296000 |
| 1 | -1.558193000 | 3.371626000  | -1.325180000 |
| 1 | -1.022561000 | 3.821283000  | 0.290986000  |
| 6 | -2.546257000 | -1.673390000 | 0.057123000  |
| 8 | -3.631749000 | -1.554782000 | -0.466425000 |
| 1 | 2.106268000  | -3.642631000 | -0.274839000 |
| 1 | 3.773176000  | -1.830084000 | -0.205801000 |
| 7 | 3.253213000  | 0.816805000  | -0.053054000 |
| 6 | 4.555473000  | 0.575762000  | -0.659290000 |
| 1 | 5.073407000  | 1.532304000  | -0.768005000 |
| 1 | 5.204784000  | -0.086995000 | -0.062166000 |
| 1 | 4.429934000  | 0.139344000  | -1.651196000 |
| 6 | 3.381846000  | 1.462851000  | 1.257063000  |
| 1 | 3.961301000  | 0.845658000  | 1.963576000  |
| 1 | 3.892103000  | 2.423236000  | 1.141658000  |
| 1 | 2.400688000  | 1.644683000  | 1.693457000  |
| 8 | -2.263821000 | -2.754388000 | 0.833188000  |
| 1 | -3.057741000 | -3.310331000 | 0.817291000  |

### CPN3C

|   |              |              |              |
|---|--------------|--------------|--------------|
| 6 | -1.854656000 | 2.563695000  | -0.147133000 |
| 6 | -0.490944000 | 2.451421000  | -0.034606000 |
| 6 | 0.112174000  | 1.170538000  | 0.015913000  |
| 6 | -0.707697000 | -0.001312000 | -0.046306000 |
| 6 | -2.137336000 | 0.148204000  | -0.091111000 |
| 6 | -2.677917000 | 1.418687000  | -0.165914000 |
| 1 | 0.133941000  | 3.335564000  | 0.002821000  |
| 6 | 1.538202000  | 1.007451000  | 0.087005000  |
| 6 | -0.088313000 | -1.279259000 | -0.111406000 |
| 6 | 1.277704000  | -1.399519000 | -0.056658000 |
| 6 | 2.100514000  | -0.254697000 | 0.059376000  |
| 1 | -0.717148000 | -2.151707000 | -0.238551000 |
| 6 | 3.555348000  | -0.654240000 | 0.113118000  |
| 6 | 3.542996000  | -2.098814000 | -0.443624000 |
| 6 | 2.134737000  | -2.646897000 | -0.105798000 |
| 1 | 3.902060000  | -0.637901000 | 1.154290000  |
| 1 | 4.206725000  | 0.020496000  | -0.446166000 |

|   |              |              |              |
|---|--------------|--------------|--------------|
| 1 | 4.346824000  | -2.714170000 | -0.035871000 |
| 1 | 3.669878000  | -2.067963000 | -1.529669000 |
| 1 | 1.777489000  | -3.381983000 | -0.830964000 |
| 1 | 2.134739000  | -3.138351000 | 0.875314000  |
| 1 | -2.313335000 | 3.544771000  | -0.199638000 |
| 1 | -3.751377000 | 1.548536000  | -0.216332000 |
| 7 | -2.940856000 | -1.024463000 | -0.083400000 |
| 6 | -4.252073000 | -0.921096000 | -0.710591000 |
| 1 | -4.653909000 | -1.928279000 | -0.847456000 |
| 1 | -4.982768000 | -0.350290000 | -0.113106000 |
| 1 | -4.160775000 | -0.452659000 | -1.691507000 |
| 6 | -3.017806000 | -1.709056000 | 1.211744000  |
| 1 | -3.677947000 | -1.177720000 | 1.916783000  |
| 1 | -3.411404000 | -2.718830000 | 1.067043000  |
| 1 | -2.030978000 | -1.785695000 | 1.665713000  |
| 6 | 2.386313000  | 2.154754000  | 0.166131000  |
| 7 | 3.083786000  | 3.075467000  | 0.230038000  |

**CPN3D**

|   |              |              |              |
|---|--------------|--------------|--------------|
| 6 | 1.810706000  | -2.596359000 | -0.147452000 |
| 6 | 0.461244000  | -2.364509000 | -0.052254000 |
| 6 | -0.029842000 | -1.033064000 | -0.016946000 |
| 6 | 0.902804000  | 0.056380000  | -0.081089000 |
| 6 | 2.314312000  | -0.222886000 | -0.094691000 |
| 6 | 2.738587000  | -1.535803000 | -0.154809000 |
| 1 | -0.225842000 | -3.195740000 | -0.003225000 |
| 6 | -1.421711000 | -0.698323000 | -0.000751000 |
| 6 | 0.419028000  | 1.388227000  | -0.175654000 |
| 6 | -0.926500000 | 1.650054000  | -0.170883000 |
| 6 | -1.871630000 | 0.598417000  | -0.081767000 |
| 1 | 1.138082000  | 2.190648000  | -0.280567000 |
| 6 | -3.275572000 | 1.159896000  | -0.099668000 |
| 6 | -3.062581000 | 2.653738000  | 0.240390000  |
| 6 | -1.641916000 | 2.980239000  | -0.274175000 |
| 1 | -3.955914000 | 0.651806000  | 0.585906000  |
| 1 | -3.699188000 | 1.035133000  | -1.102029000 |
| 1 | -3.096272000 | 2.788681000  | 1.325620000  |
| 1 | -3.830496000 | 3.295204000  | -0.195430000 |
| 1 | -1.673241000 | 3.305853000  | -1.321645000 |
| 1 | -1.150964000 | 3.773891000  | 0.293598000  |
| 1 | 2.175196000  | -3.616612000 | -0.190671000 |
| 1 | 3.796058000  | -1.764407000 | -0.188157000 |
| 7 | 3.220165000  | 0.872672000  | -0.082303000 |
| 6 | 4.521111000  | 0.649858000  | -0.699742000 |
| 1 | 5.014005000  | 1.616135000  | -0.833949000 |
| 1 | 5.192487000  | 0.015523000  | -0.096823000 |
| 1 | 4.394422000  | 0.190795000  | -1.681152000 |

|   |              |              |              |
|---|--------------|--------------|--------------|
| 6 | 3.348542000  | 1.549339000  | 1.213181000  |
| 1 | 3.953691000  | 0.962268000  | 1.923206000  |
| 1 | 3.831164000  | 2.520090000  | 1.070751000  |
| 1 | 2.369150000  | 1.713830000  | 1.660225000  |
| 7 | -2.436582000 | -1.762034000 | 0.106531000  |
| 8 | -3.425126000 | -1.672399000 | -0.614617000 |
| 8 | -2.254489000 | -2.661199000 | 0.919942000  |
